# Supplementary material for: A family of 3d metal clusters based on N–N single bonds bridged quasi-linear trinuclear cores: the Mn analogue displaying single-molecule magnet behavior
Source: PubMed Central journal article supplement — RSC Adv. 2018 Feb 7;8(12):6218–24. doi: 10.1039/c7ra12844d (PMC9078267; doi:10.1039/c7ra12844d), 2018-02-07
Supplement: RA-008-C7RA12844D-s001.pdf [file RA-008-C7RA12844D-s001.pdf]

# Electronic Supplementary Information for

## A family of 3d metal clusters based on N–N single bonds bridged quasi-linear trinuclear cores: the Mn analogue displaying single-molecule magnet behavior

Kai Wang,<sup>a</sup> Shen Tang,<sup>a</sup> Zhao-Bo Hu,<sup>b</sup> Hua-Hong Zou,<sup>b</sup> Xiao-Lu Wang,<sup>b</sup> Yan Li,<sup>a</sup> Shu-Hua Zhang,<sup>a</sup>  
Zi-Lu Chen<sup>b</sup> and Fu-Pei Liang<sup>a,b,\*</sup>

### Table of content:

1. **Table S1** Previous reported linear and quasi-linear Mn clusters showing SMM behavior
2. **Fig. S1** The meaning plane composed of metal centers and their donors in equatorial positions for **1-4**.
3. **Fig. S2** Supramolecular chain along the *b*-axis linked together by  $\pi$ - $\pi$  interactions in **2**.
4. **Fig. S3** Supramolecular chain linked by  $\pi$ - $\pi$  interactions in **3** viewed along the *c*-axis.
5. **Fig. S4** Plots of  $\chi_m^{-1}-T$  for **1-4**. The red lines represent the best fitting according to Curie-Weiss law.
6. **Fig. S5** Hysteresis loop of **1** recorded at 1.8 K and the expansion of hysteresis region (inset).
7. **Table S2** The relative structural and magnetic parameters of **1-4**.
8. **Table S3** Data of  $\pi$ - $\pi$  interactions for **2** and **3**.
9. **Table S4** Crystal data and structure refinement parameters for **1-4**.
10. **Table S5** Selected Bond Lengths (Å) and Bond Angles (°) of **1**.
11. **Table S6** Selected Bond Lengths (Å) and Bond Angles (°) of **2**.
12. **Table S7** Selected Bond Lengths (Å) and Bond Angles (°) of **3**.
13. **Table S8** Selected Bond Lengths (Å) and Bond Angles (°) of **4**.

---

<sup>a</sup>Guangxi Key Laboratory of Electrochemical and Magnetochemical Functional Materials, College of Chemistry and Bioengineering, Guilin University of Technology, Guilin, 541004, China. \*E-mail: [fliangoffice@yahoo.com](mailto:fliangoffice@yahoo.com)

<sup>b</sup>State Key Laboratory for the Chemistry and Molecular Engineering of Medicinal Resources, School of Chemistry and Pharmacy, Guangxi Normal University, Guilin, 541004, China.

**Table S1** Previous reported linear and quasi-linear Mn clusters showing SMM behavior

| Molecular Structures                                                                | Formulas                                                                                                                                                                                                                                                   | Bridging Ligands <sup>a</sup>                                                         | Ref. |
|-------------------------------------------------------------------------------------|------------------------------------------------------------------------------------------------------------------------------------------------------------------------------------------------------------------------------------------------------------|---------------------------------------------------------------------------------------|------|
| 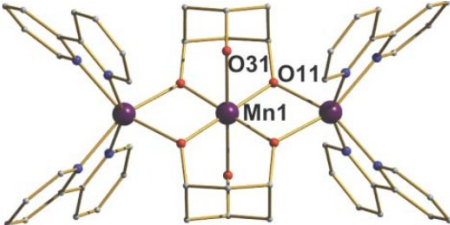   | [Mn <sup>III</sup> Mn <sub>2</sub> <sup>II</sup> (Hcht) <sub>2</sub> (bpy) <sub>4</sub> ](ClO <sub>4</sub> ) <sub>3</sub> ·<br>Et <sub>2</sub> O·2MeCN<br>(H <sub>3</sub> cht = <i>cis,cis</i> -1,3,5-<br>cyclohexanetriol)                                |    | 7a   |
|   | [Mn <sup>III</sup> <sub>2</sub> Mn <sup>II</sup> (hmi) <sub>2</sub> (OMe) <sub>2</sub> Cl <sub>2</sub> ]·Me<br>OH<br>(H <sub>2</sub> hmi = ((2-hydroxy-3-<br>methoxyphenyl)methylene)isonic<br>otinohydrazine])                                            | Cl <sup>-</sup> and CH <sub>3</sub> O <sup>-</sup> ions                               | 7b   |
|  | [Mn <sub>2</sub> <sup>IV</sup> Mn <sup>III</sup> Na(BuSao) <sub>6</sub> ( <i>n</i> -<br>PrOH) <sub>4</sub> ·( <i>n</i> -PrOH) <sub>4</sub> ]<br>(BuSaoH <sub>2</sub> = 3,5-di- <i>tert</i> -butyl-<br>salicylaldoxime)                                     |  | 7c   |
|  | [Mn <sup>III</sup> <sub>2</sub> Mn <sub>2</sub> <sup>II</sup><br>(hmp) <sub>6</sub> (N(CN) <sub>2</sub> ) <sub>4</sub> (H <sub>2</sub> O) <sub>2</sub> ]<br>(Hhmp = 2-(hydroxymethyl)<br>pyridine; N(CN) <sub>2</sub> <sup>-</sup> = dicyanamide<br>anion) |  | 7d   |

<sup>a</sup>The bridging atoms/groups were highlighted with red.

## References

7. (a) A. Prescimone, J. Wolowska, G. Rajaraman, S. Parsons, W. Wernsdorfer, M. Murugesu, G. Christou, S. Piligkos, E. J. L. McInnes and E. K. Brechin, *Dalton Trans.*, 2007, 5282; (b) P. H. Lin, S. Gorelsky, D. Savard, T. J. Burchell, W. Wernsdorfer, R. Clérac and M. Murugesu, *Dalton Trans.*, 2010, **39**, 7650; (c) C. L. Zhou, Z. M. Wang, B. W. Wang and S. Gao, *Dalton Trans.*, 2012, **41**, 13620; (d) D. C. Li, H. S. Wang, S. N. Wang, Y. P. Pan, C. J. Li, J. M. Dou and Y. Song, *Inorg. Chem.*, 2010, **49**, 3688.

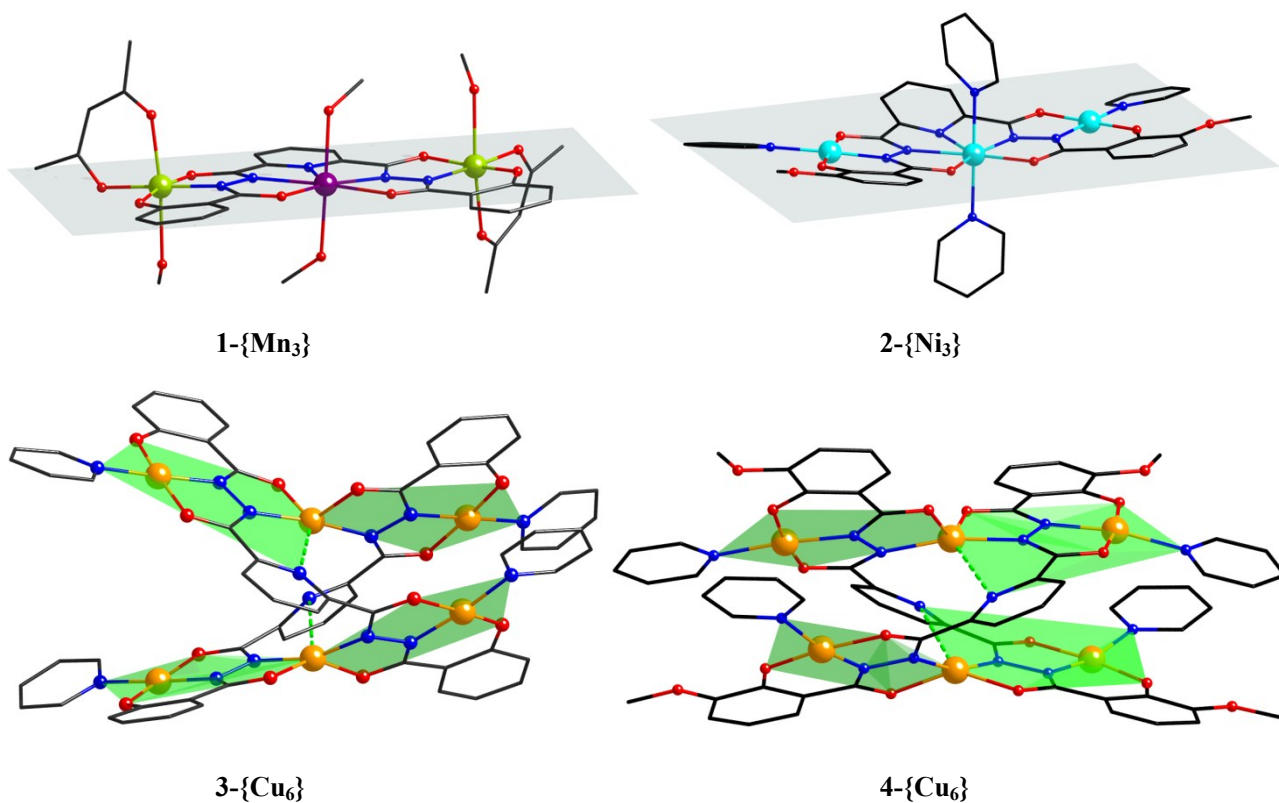

**Fig. S1** The meaning plane composed of metal centers and their donors in equatorial positions for 1-4.

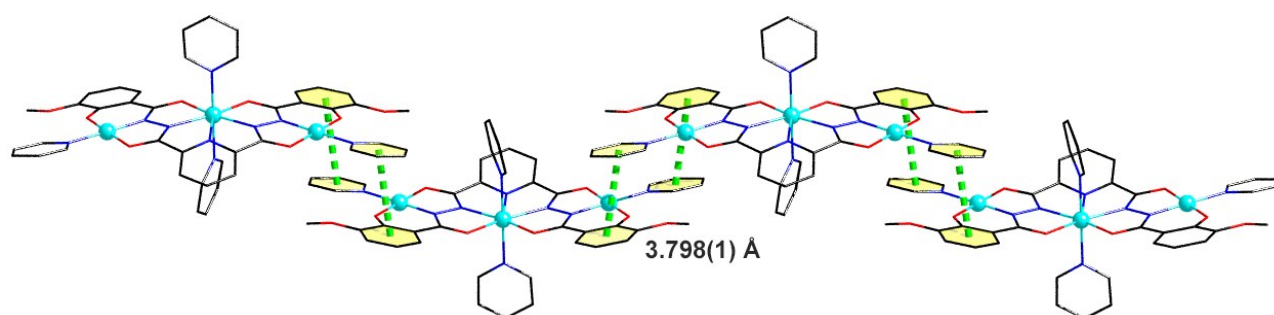

**Fig. S2** Supramolecular chain along the *b*-axis linked together by  $\pi$ - $\pi$  interactions in 2.

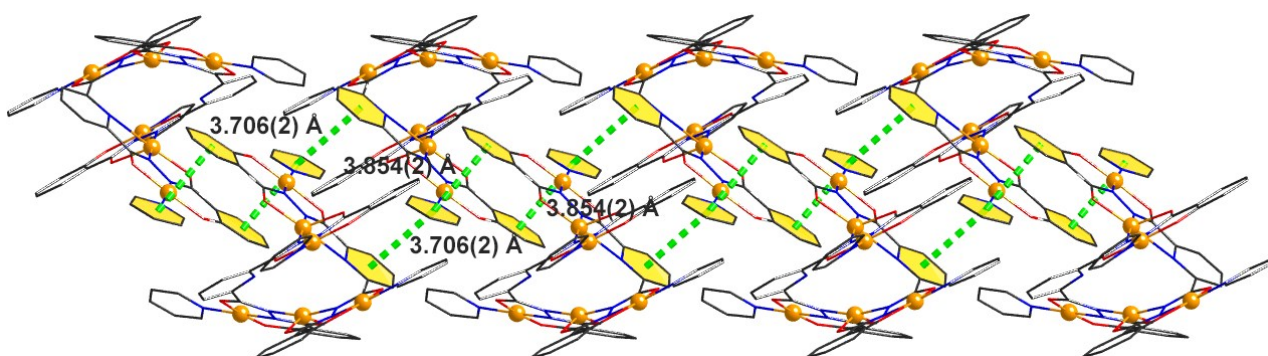

**Fig. S3** Supramolecular chain linked by  $\pi$ - $\pi$  interactions in 3 viewed along the *c*-axis.

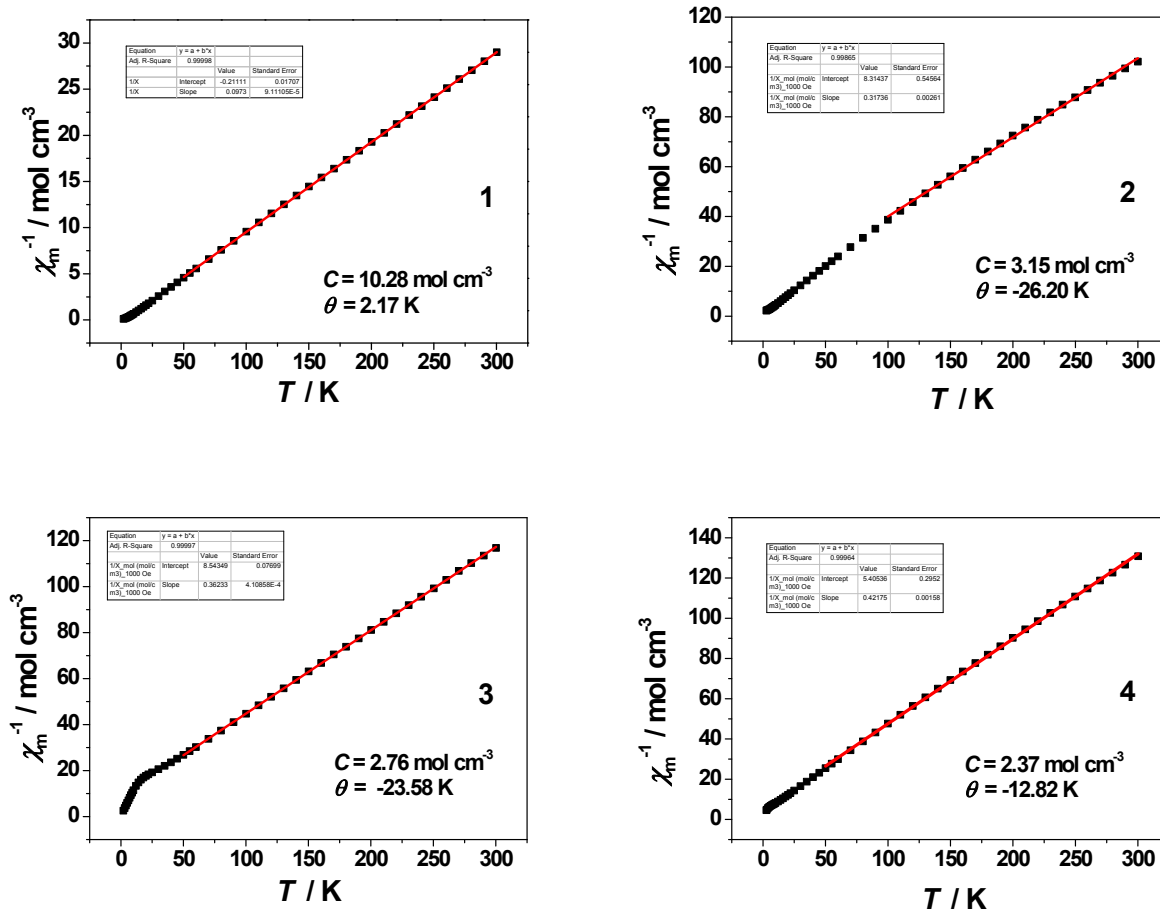

Fig. S4 Plots of  $\chi_m^{-1}-T$  for 1-4. The red lines represent the best fitting according to Curie-Weiss law.

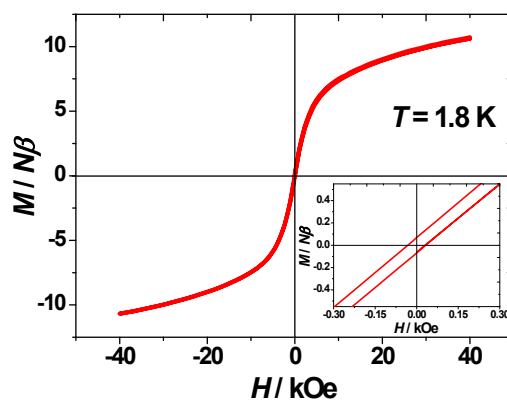

Fig. S5 Hysteresis loop of 1 recorded at 1.8 K and the expansion of hysteresis region (inset).

**Table S2** The relative structural and magnetic parameters of **1–4**.

| <b>Main parameters</b>                                                           | <b>1</b> | <b>2</b> | <b>3</b>                     | <b>4</b>                     |
|----------------------------------------------------------------------------------|----------|----------|------------------------------|------------------------------|
| <b>Structural</b>                                                                |          |          |                              |                              |
| M–N–N–M torsion angle (°)                                                        | 172.5    | 177.2    | 178.3, 167.6<br>170.8, 170.6 | 173.9, 175.2<br>172.7, 174.1 |
| M···M distance (Å)                                                               | 4.935    | 4.728    | 4.569, 4.564<br>4.545, 4.534 | 4.579, 4.585<br>4.585, 4.582 |
| M–M–M angles (°)                                                                 | 153.1    | 151.9    | 162.0, 171.4                 | 175.4, 169.3                 |
| Angles between J–T axes (°)                                                      | 6.2      | none     | none                         | none                         |
| <b>Magnetic</b>                                                                  |          |          |                              |                              |
| S of 3d ions                                                                     | 2, 5/2   | 1        | 1/2                          | 1/2                          |
| Expected $\chi_m T$ values<br>at 300 K (cm <sup>3</sup> mol <sup>-1</sup> K)     | 10.375   | 3.0      | 2.5                          | 2.5                          |
| Experimental $\chi_m T$ values<br>at 300 K (cm <sup>3</sup> mol <sup>-1</sup> K) | 10.35    | 2.94     | 2.57                         | 2.29                         |
| C (cm <sup>3</sup> mol <sup>-1</sup> )                                           | 10.28    | 3.15     | 2.76                         | 2.37                         |
| $\theta$ (K)                                                                     | 2.17     | –26.20   | –23.58                       | –12.82                       |
| $J$ (cm <sup>-1</sup> )                                                          | 5.1      | –12.6    | –5.2, –3.9,<br>–4.7, –3.5    | –11.1, –9.5,<br>–10.9, –9.1  |
| $zJ$ (cm <sup>-1</sup> )                                                         | –0.12    | –0.18    | –0.27                        | –0.33                        |
| Expected $g$ values                                                              | 2        | 2.2      | 2                            | 2                            |
| Fitted $g$ values                                                                | 1.99     | 2.2      | 2.1                          | 2.1                          |
| Magnetic interactions                                                            | FM       | AFM      | AFM                          | AFM                          |

**Table S3** Data of  $\pi$ - $\pi$  interactions for **2** and **3**.

| Aromatic rings                          | Twist angle (°) | Fold angle (°) | Centroid-to-centroid distance (Å) |
|-----------------------------------------|-----------------|----------------|-----------------------------------|
| <b>2</b>                                |                 |                |                                   |
| C1–C6 and N3, C13–C17 <sup>a</sup>      | 170.058         | 173.859        | 3.798                             |
| <b>3</b>                                |                 |                |                                   |
| N6, C23–C26 and C1–C6 <sup>b</sup>      | 15.960          | 5.841          | 3.854                             |
| N6, C23–C26 and N3, C9–C13 <sup>c</sup> | 29.554          | 6.472          | 3.706                             |

Symmetry code: (a)  $-x, 1-y, 1-z$ . (b)  $1-x, -y, 1-z$ .; (c)  $2-x, -y, 1-z$ .

**Table S4** Crystal data and structure refinement parameters for **1-4**.

| <b>Identification</b>                                           | <b>1</b>                                                                       | <b>2</b>                                                                      | <b>3</b>                                                                        | <b>4</b>                                                                        |
|-----------------------------------------------------------------|--------------------------------------------------------------------------------|-------------------------------------------------------------------------------|---------------------------------------------------------------------------------|---------------------------------------------------------------------------------|
| Empirical formula                                               | C <sub>35</sub> H <sub>41</sub> N <sub>5</sub> O <sub>14</sub> Mn <sub>3</sub> | C <sub>43</sub> H <sub>33</sub> N <sub>9</sub> O <sub>8</sub> Ni <sub>3</sub> | C <sub>62</sub> H <sub>42</sub> N <sub>14</sub> O <sub>12</sub> Cu <sub>6</sub> | C <sub>71</sub> H <sub>68</sub> N <sub>16</sub> O <sub>20</sub> Cu <sub>6</sub> |
| Formula weight                                                  | 920.55                                                                         | 981.93                                                                        | 1556.34                                                                         | 1846.67                                                                         |
| Temp/K                                                          | 296.15                                                                         | 150.15                                                                        | 150.15                                                                          | 150.15                                                                          |
| Crystal system                                                  | orthorhombic                                                                   | orthorhombic                                                                  | triclinic                                                                       | monoclinic                                                                      |
| Space group                                                     | <i>Pbcn</i>                                                                    | <i>Pnma</i>                                                                   | <i>P</i> $\bar{1}$                                                              | <i>P2</i> <sub>1</sub> / <i>c</i>                                               |
| <i>a</i> /Å                                                     | 17.0744(3)                                                                     | 17.9052(2)                                                                    | 11.9690(6)                                                                      | 14.6309(5)                                                                      |
| <i>b</i> /Å                                                     | 20.5494(4)                                                                     | 25.3476(2)                                                                    | 14.4468(6)                                                                      | 35.9987(10)                                                                     |
| <i>c</i> /Å                                                     | 11.4918(2)                                                                     | 8.99870(10)                                                                   | 17.6248(9)                                                                      | 14.3693(4)                                                                      |
| $\alpha$ /°                                                     | 90.00                                                                          | 90.00                                                                         | 89.892(4)                                                                       | 90.00                                                                           |
| $\beta$ /°                                                      | 90.00                                                                          | 90.00                                                                         | 73.514(4)                                                                       | 90.793(2)                                                                       |
| $\gamma$ /°                                                     | 90.00                                                                          | 90.00                                                                         | 82.879(4)                                                                       | 90.00                                                                           |
| <i>V</i> /Å <sup>3</sup>                                        | 4032.12(13)                                                                    | 4084.09(7)                                                                    | 2898.0(2)                                                                       | 7567.5(4)                                                                       |
| <i>Z</i>                                                        | 4                                                                              | 4                                                                             | 2                                                                               | 4                                                                               |
| <i>D</i> <sub>c</sub> /g cm <sup>-3</sup>                       | 1.516                                                                          | 1.597                                                                         | 1.784                                                                           | 1.536                                                                           |
| <i>m</i> $\mu$ /mm <sup>-1</sup>                                | 0.996                                                                          | 1.436                                                                         | 2.242                                                                           | 1.731                                                                           |
| <i>F</i> (000)                                                  | 1892.0                                                                         | 2016.0                                                                        | 1564.0                                                                          | 3544.0                                                                          |
| Reflections collected                                           | 41834                                                                          | 33538                                                                         | 26793                                                                           | 58702                                                                           |
| Independent reflections                                         | 4993                                                                           | 3681                                                                          | 10172                                                                           | 13305                                                                           |
| Data/restraints/parameters                                      | 4993/4/269                                                                     | 3681/6/314                                                                    | 10178/0/847                                                                     | 13305/0/968                                                                     |
| <i>R</i> <sub>int</sub>                                         | 0.0514                                                                         | 0.0311                                                                        | 0.0240                                                                          | 0.0720                                                                          |
| GOF                                                             | 1.104                                                                          | 1.067                                                                         | 1.065                                                                           | 1.028                                                                           |
| Final <i>R</i> indexes<br>( <i>I</i> > 2 $\sigma$ ( <i>I</i> )) | <i>R</i> <sub>1</sub> = 0.0414,<br><i>wR</i> <sub>2</sub> = 0.0924             | <i>R</i> <sub>1</sub> = 0.0222,<br><i>wR</i> <sub>2</sub> = 0.0582            | <i>R</i> <sub>1</sub> = 0.0312,<br><i>wR</i> <sub>2</sub> = 0.0757              | <i>R</i> <sub>1</sub> = 0.0616,<br><i>wR</i> <sub>2</sub> = 0.1467              |
| Final <i>R</i> indexes<br>(all data)                            | <i>R</i> <sub>1</sub> = 0.0621,<br><i>wR</i> <sub>2</sub> = 0.1014             | <i>R</i> <sub>1</sub> = 0.0237,<br><i>wR</i> <sub>2</sub> = 0.0590            | <i>R</i> <sub>1</sub> = 0.0409,<br><i>wR</i> <sub>2</sub> = 0.0800              | <i>R</i> <sub>1</sub> = 0.0975,<br><i>wR</i> <sub>2</sub> = 0.1594              |

| Bond       | Length (Å)  | Bond                   | Length (Å)  | Bond                    | Length (Å)  |
|------------|-------------|------------------------|-------------|-------------------------|-------------|
| Mn1-O1     | 1.8711 (17) | Mn1-O6                 | 2.347 (2)   | Mn2-O7                  | 2.2105 (18) |
| Mn1-O3     | 1.9580 (16) | Mn1-N1                 | 1.9305 (19) | Mn2-N2                  | 2.2402 (18) |
| Mn1-O4     | 1.9251 (17) | Mn2-O2                 | 2.2960 (16) | Mn2-N3                  | 2.465 (3)   |
| Mn1-O5     | 2.1612 (19) |                        |             |                         |             |
| Bond Angle | Angle(°)    | Bond Angle             | Angle(°)    | Bond Angle              | Angle(°)    |
| O1-Mn1-O3  | 169.99 (7)  | O4-Mn1-O6              | 85.83 (8)   | O7 <sup>a</sup> -Mn2-O2 | 90.42 (7)   |
| O1-Mn1-O4  | 93.66 (8)   | O4-Mn1-N1              | 175.72 (8)  | O7 <sup>a</sup> -Mn2-O7 | 175.07 (11) |
| O1-Mn1-O5  | 94.66 (8)   | O5-Mn1-O6              | 173.68 (7)  | O7 <sup>a</sup> -Mn2-N2 | 88.34 (7)   |
| O1-Mn1-O6  | 84.95 (8)   | N1-Mn1-O3              | 81.56 (7)   | O7-Mn2-N2               | 89.56 (7)   |
| O1-Mn1-N1  | 90.27 (8)   | N1-Mn1-O5              | 93.49 (8)   | O7-Mn2-N3               | 87.54 (6)   |
| O3-Mn1-O5  | 91.61 (7)   | N1-Mn1-O6              | 92.83 (8)   | N2-Mn2-O2 <sup>a</sup>  | 162.08 (6)  |
| O3-Mn1-O6  | 89.67 (7)   | O2-Mn2-O2 <sup>a</sup> | 93.69 (8)   | N2-Mn2-O2               | 68.42 (6)   |
| O4-Mn1-O3  | 94.36 (7)   | O2-Mn2-N3              | 133.16 (4)  | N2-Mn2-N2 <sup>a</sup>  | 129.48 (10) |
| O4-Mn1-O5  | 87.90 (7)   | O7-Mn2-O2              | 92.95 (7)   | N2-Mn2-N3               | 64.74 (5)   |

**Table S5** Selected Bond Lengths (Å) and Bond Angles (°) of **1**.

Symmetry code: (a)  $-x, y, -z+3/2$ .

| Bond       | Length (Å)  | Bond                    | Length (Å)  | Bond                   | Length (Å)  |
|------------|-------------|-------------------------|-------------|------------------------|-------------|
| Ni1-O2     | 1.8208 (14) | Ni1-N3                  | 1.9389 (18) | Ni2-N5                 | 2.1227 (16) |
| Ni1-O4     | 1.8761 (15) | Ni2-O3                  | 2.0695 (14) | Ni2-N6                 | 2.0999 (16) |
| Ni1-N1     | 1.8271 (17) | Ni2-N2                  | 2.1633 (17) |                        |             |
| Bond Angle | Angle(°)    | Bond Angle              | Angle(°)    | Bond Angle             | Angle(°)    |
| O2-Ni1-O4  | 177.27 (7)  | N1-Ni1-N3               | 176.17 (8)  | O3-Ni2-N6              | 89.60 (5)   |
| O2-Ni1-N1  | 93.10 (7)   | O3 <sup>a</sup> -Ni2-O3 | 89.90 (8)   | N2-Ni2-N2 <sup>a</sup> | 120.88 (9)  |
| O2-Ni1-N3  | 89.85 (7)   | O3-Ni2-N2               | 74.56 (6)   | N5-Ni2-N2              | 91.03 (5)   |
| O4-Ni1-N3  | 92.46 (7)   | O3 <sup>a</sup> -Ni2-N2 | 164.32 (6)  | N6-Ni2-N2              | 88.23 (5)   |
| N1-Ni1-O4  | 84.65 (7)   | O3-Ni2-N5               | 91.45 (5)   | N6-Ni2-N5              | 178.51 (9)  |

**Table S6** Selected Bond Lengths (Å) and Bond Angles (°) of **2**.

Symmetry code: (a)  $x, -y+3/2, z$ .



| Bond        | Length (Å)  | Bond        | Length (Å)  | Bond       | Length (Å)  |
|-------------|-------------|-------------|-------------|------------|-------------|
| Cu1-O1      | 1.875 (2)   | Cu3-O10     | 1.946 (2)   | Cu5-O5     | 1.9941 (19) |
| Cu1-O3      | 1.975 (2)   | Cu3-O12     | 1.872 (2)   | Cu5-O8     | 1.982 (2)   |
| Cu1-N1      | 1.892 (2)   | Cu3-N12     | 1.902 (2)   | Cu5-N4     | 1.907 (2)   |
| Cu1-N6      | 1.981 (2)   | Cu3-N14     | 2.010 (2)   | Cu5-N9     | 1.913 (2)   |
| Cu2-O2      | 2.033 (2)   | Cu4-O7      | 1.888 (2)   | Cu6-O4     | 1.996 (2)   |
| Cu2-O11     | 2.043 (2)   | Cu4-O9      | 1.987 (2)   | Cu6-O6     | 1.889 (2)   |
| Cu2-N2      | 1.927 (2)   | Cu4-N8      | 1.889 (2)   | Cu6-N5     | 1.888 (2)   |
| Cu2-N11     | 1.928 (2)   | Cu4-N13     | 1.981 (2)   | Cu6-N7     | 1.978 (2)   |
| Bond Angle  | Angle(°)    | Bond Angle  | Angle(°)    | Bond Angle | Angle(°)    |
| O1-Cu1-O3   | 174.18 (9)  | O10-Cu3-N14 | 93.63 (10)  | O8-Cu5-O5  | 148.13 (9)  |
| O1-Cu1-N1   | 92.37 (10)  | O12-Cu3-O10 | 174.62 (8)  | N4-Cu5-O5  | 80.55 (9)   |
| O1-Cu1-N6   | 91.82 (10)  | O12-Cu3-N12 | 93.09 (10)  | N4-Cu5-O8  | 102.29 (9)  |
| O3-Cu1-N6   | 93.98 (9)   | O12-Cu3-N14 | 91.75 (10)  | N4-Cu5-N9  | 163.35 (11) |
| N1-Cu1-O3   | 81.89 (9)   | N12-Cu3-O10 | 81.54 (9)   | N9-Cu5-O5  | 105.76 (9)  |
| N1-Cu1-N6   | 174.09 (11) | N12-Cu3-N14 | 174.38 (11) | N9-Cu5-O8  | 80.64 (9)   |
| O2-Cu2-O11  | 123.04 (9)  | O7-Cu4-O9   | 172.91 (8)  | O6-Cu6-O4  | 173.15 (9)  |
| N2-Cu2-O2   | 79.48 (9)   | O7-Cu4-N8   | 91.46 (9)   | O6-Cu6-N7  | 94.44 (10)  |
| N2-Cu2-O11  | 105.06 (9)  | O7-Cu4-N13  | 93.02 (10)  | N5-Cu6-O4  | 81.86 (9)   |
| N2-Cu2-N11  | 173.68 (11) | N8-Cu4-O9   | 81.79 (9)   | N5-Cu6-O6  | 91.84 (9)   |
| N11-Cu2-O2  | 100.74 (9)  | N8-Cu4-N13  | 175.51 (10) | N5-Cu6-N7  | 173.16 (10) |
| N11-Cu2-O11 | 80.19 (9)   | N13-Cu4-O9  | 93.72 (9)   | N7-Cu6-O4  | 91.73 (9)   |

**Table S7** Selected Bond Lengths (Å) and Bond Angles (°) of **3**.

**Table S8** Selected Bond Lengths (Å) and Bond Angles (°) of **4**.

| Bond        | Length (Å)  | Bond        | Length (Å)  | Bond       | Length (Å)  |
|-------------|-------------|-------------|-------------|------------|-------------|
| Cu1-O2      | 1.874 (4)   | Cu3-O13     | 1.965 (4)   | Cu5-O6     | 1.960 (4)   |
| Cu1-O4      | 1.966 (4)   | Cu3-O15     | 1.890 (4)   | Cu5-O11    | 1.982 (4)   |
| Cu1-N1      | 1.892 (5)   | Cu3-N12     | 1.897 (5)   | Cu5-N4     | 1.951 (5)   |
| Cu1-N6      | 1.982 (5)   | Cu3-N14     | 1.984 (5)   | Cu5-N9     | 1.952 (5)   |
| Cu2-O3      | 2.012 (4)   | Cu4-O10     | 1.880 (4)   | Cu6-O5     | 1.964 (4)   |
| Cu2-O14     | 2.003 (4)   | Cu4-O12     | 1.976 (4)   | Cu6-O7     | 1.897 (4)   |
| Cu2-N2      | 1.941 (5)   | Cu4-N8      | 1.896 (5)   | Cu6-N5     | 1.881 (5)   |
| Cu2-N11     | 1.945 (5)   | Cu4-N13     | 1.993 (5)   | Cu6-N7     | 1.993 (5)   |
| Bond Angle  | Angle(°)    | Bond Angle  | Angle(°)    | Bond Angle | Angle(°)    |
| O2-Cu1-O4   | 171.53 (19) | O13-Cu3-N14 | 92.7 (2)    | O6-Cu5-O11 | 144.93 (19) |
| O2-Cu1-N1   | 92.67 (19)  | O15-Cu3-O13 | 172.09 (18) | N4-Cu5-O6  | 80.73 (19)  |
| O2-Cu1-N6   | 93.0 (2)    | O15-Cu3-N12 | 91.81 (18)  | N4-Cu5-O11 | 105.98 (19) |
| O4-Cu1-N6   | 92.8 (2)    | O15-Cu3-N14 | 94.2 (2)    | N4-Cu5-N9  | 163.5 (2)   |
| N1-Cu1-O4   | 81.85 (18)  | N12-Cu3-O13 | 82.04 (17)  | N9-Cu5-O6  | 103.07 (19) |
| N1-Cu1-N6   | 173.6 (2)   | N12-Cu3-N14 | 169.5 (2)   | N9-Cu5-O11 | 80.29 (19)  |
| O14-Cu2-O3  | 135.29 (18) | O10-Cu4-O12 | 172.6 (2)   | O5-Cu6-N7  | 92.56 (19)  |
| N2-Cu2-O3   | 79.98 (18)  | O10-Cu4-N8  | 91.4 (2)    | O7-Cu6-O5  | 172.51 (19) |
| N2-Cu2-O14  | 102.74 (18) | O10-Cu4-N13 | 92.9 (2)    | O7-Cu6-N7  | 94.3 (2)    |
| N2-Cu2-N11  | 168.1 (2)   | O12-Cu4-N13 | 94.2 (2)    | N5-Cu6-O5  | 81.75 (18)  |
| N11-Cu2-O3  | 106.75 (18) | N8-Cu4-O12  | 81.88 (19)  | N5-Cu6-O7  | 92.16 (19)  |
| N11-Cu2-O14 | 79.58 (17)  | N8-Cu4-N13  | 170.6 (2)   | N5-Cu6-N7  | 167.3 (2)   |
